# Supplementary material for: Geridonin and paclitaxel act synergistically to inhibit the proliferation of gastric cancer cells through ROS-mediated regulation of the PTEN/PI3K/Akt pathway
Source: PubMed Central journal article supplement (PMC5341958; doi:10.18632/oncotarget.12166), 2016-09-21
Supplement: oncotarget-07-72990-s001.pdf [file oncotarget-07-72990-s001.pdf]

# Geridonin and paclitaxel act synergistically to inhibit the proliferation of gastric cancer cells through ROS-mediated regulation of the PTEN/PI3K/Akt pathway

## Supplementary Materials

### SUPPLEMENTARY DATA

#### Synthesis of geridonin and preparation of the ligand solution

Oridonin (5.0 g) was dissolved in acetone (120 mL) and 2, 2-dimethoxypropane (20 mL) and catalytic p-toluenesulfonic acid (PTSA) added at room temperature. The reaction mixture was heated to 50°C and maintained for 1.5 h under argon. Dilute NaHCO<sub>3</sub> solution was added once the mixture had cooled to room temperature. The mixture was then extracted three times with CHCl<sub>3</sub>. The combined organic layers were dried over anhydrous Na<sub>2</sub>SO<sub>4</sub> and the solvent removed under vacuum. The residue was then recrystallized from methanol affording the title compound geridonin as the white needle solid (yield 88.3%) with a melting point of 219–221°C.

#### Nuclear magnetic resonance (NMR) spectroscopy of geridonin

<sup>1</sup>H NMR and <sup>13</sup>C NMR spectra were recorded on a Bruker 400 and 100 MHz spectrometer (Billerica, MA,

USA), respectively. <sup>1</sup>H-NMR (CDCl<sub>3</sub>) δppm: 6.14, 5.55 (each 1H, s, H2-17), 5.90 (1H, d, J = 11.0 Hz, C-6-OH), 4.79 (1H, s, H-14), 4.24, 4.04 (each 1H, d, J = 10.0Hz, H2-20), 3.87 (1H, dd, J = 10.4, 8.0 Hz, H-6), 3.46 (1H, m, H-1), 3.06 (1H, d, J = 9.2Hz, H-13), 2.52 (1H, dt, J = 8.8, 13.6Hz, H-12), 1.48-1.62 (2H, m, H-2), 1.65, 1.32 (each 3H, s, CH<sub>3</sub> × 2), 1.15 (6H, s, CH<sub>3</sub> × 2); <sup>13</sup>C NMR (CDCl<sub>3</sub>) δppm: 205.53 (C-15), 150.88 (C-16), 119.97 (C-17), 100.99 (C-21), 94.86 (C-7), 74.52 (C-14), 73.08 (C-20), 70.06 (C-1), 62.68 (C-8), 58.96 (C-9), 56.34 (C-11), 51.08 (C-5), 40.90 (C-12), 40.35 (C-13), 38.99 (C-10), 33.67 (C-3), 33.30 (C-18), 30.53 (C-4), 30.20 (C-3), 29.76 (C-22), 25.51 (C-23), 22.55 (C-6), 20.01 (C-2).

#### High-resolution electrospray ionization mass spectrometry of geridonin

High-resolution electrospray ionization mass spectra were recorded on a Waters Micromass Q-ToF Micromass spectrometer (Milford, MA, USA). Calcd. C<sub>23</sub>H<sub>32</sub>O<sub>6</sub> [M + Na]<sup>+</sup> *m/z*: 427.2099, found: 427.2098.

WANGCHUNJIN-RA-POS #187 RT: 0.83 AV: 1 NL: 5.07E7  
T: FTMS + p ESI Full ms [200.00-600.00]

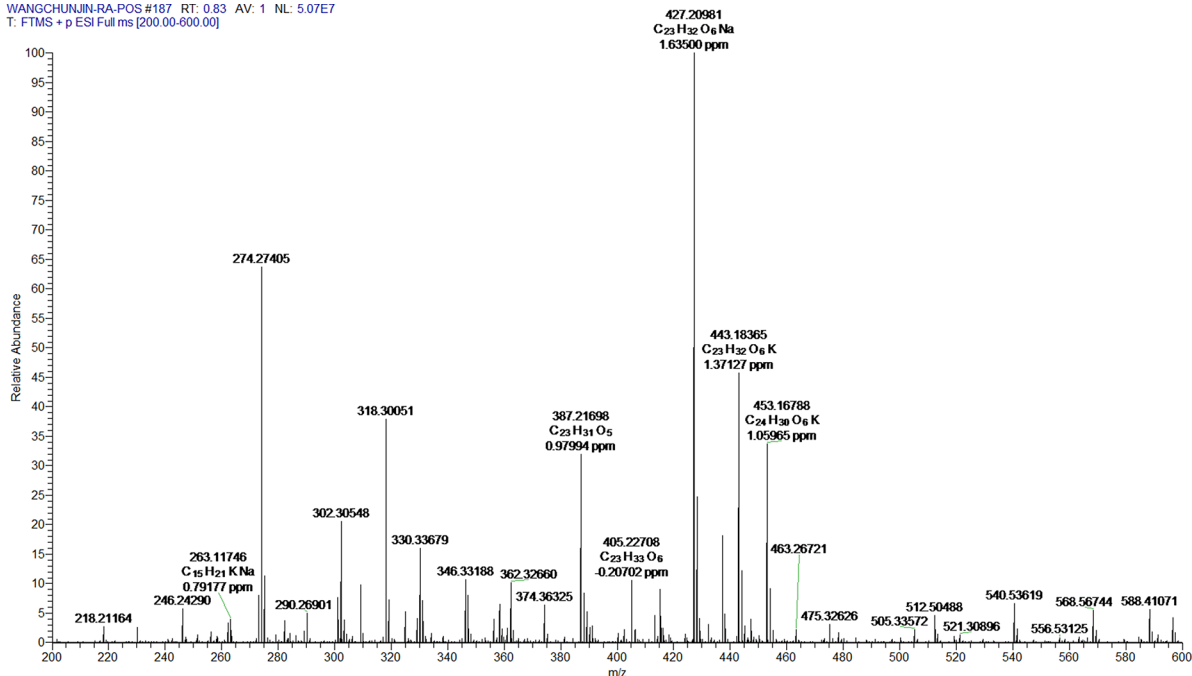

**Supplementary Figure S1: High resolution electrospray ionization mass spectrometry of geridonin.** High-resolution electrospray ionization mass spectra of geridonin were recorded on a Waters Micromass Q-ToF Micromass spectrometer.

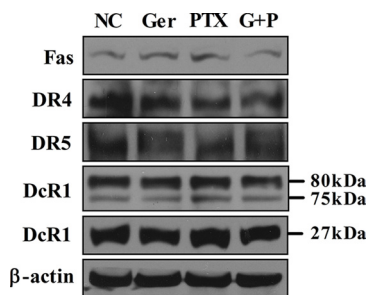

**Supplementary Figure S2: Geridonin and paclitaxel do not affect the expression of Fas, DR4, DR5, or DcR1.** Western blot analysis was performed after treatment with geridonin (10  $\mu$ M), paclitaxel (15 nM), or geridonin plus paclitaxel for 24 h.  $\beta$ -actin was used as a loading control.
